# Supplementary material
Source: publisher figshare collection journal article supplement (https://acs.figshare.com/ndownloader/files/12948476)
Supplement: Supplementary file 1 [file 12948476]

## *Supporting information for*

# **Concavity Tuning of Intermetallic Pd-Pb Nanocubes for Selective Semihydrogenation Catalysis**

Junbo Zhang,<sup>1+</sup> Weiwei Xu,<sup>2+</sup> Lai, Xu,<sup>2\*</sup> Qi Shao,<sup>1</sup> and Xiaoqing Huang<sup>1\*</sup>

<sup>1</sup>*College of Chemistry, Chemical Engineering and Materials Science, Soochow University, Jiangsu 215123, China.*

<sup>2</sup>*Institute of Functional Nano & Soft Materials (FUNSOM), Jiangsu Key Laboratory for Carbon-Based Functional Materials & Devices, Soochow University, Jiangsu, 215123, China.*

Email: xulai15@suda.edu.cn; hxq006@suda.edu.cn

## **Experimental Procedures**

**1.1 DFT models and calculations:** All the calculations were carried out by the “Vienna ab initio simulation package” (VASP5.4.4).<sup>1-4</sup> The core and valence electrons were represented by the projector augmented wave (PAW) method and plane-wave basis functions with a kinetic energy cut-off of 400 eV, and the Brillouin zone was sampled using a Gamma Monkhorst-Pack grid. The generalized gradient approximation (GGA) with Perdew-Burke-Ernzerh (PBE) functional was chosen to describe the electronic interaction effect in the calculations.<sup>5</sup> Ground-state atomic geometries were obtained by minimizing the energy and force to  $1.0 \times 10^{-5}$  eV/atom and 0.05 eV/Å. To examine the effect of van der Waals interaction on reaction energetics, calculations were performed by using the DFT-D3 functional with PBE-PAW potentials.<sup>1,6</sup> The vacuum spacing in the direction along Z axis, with respect to the surface was 15 Å between neighboring slab images, which is sufficient to eliminate the interactions between the slabs. The climbing image nudged elastic band (CI-NEB) method was used to search the transition states and track minimum-energy paths for the reactions.<sup>7-8</sup>

## **Reference**

- (1) Kresse, G.; Joubert, D. From ultrasoft pseudopotentials to the projector augmented-wave method. *Phys. Rev. B* **1999**, *59*, 1758-1775.
- (2) Kresse, G.; Furthmüller, J. Efficient iterative schemes for *ab-initio* total-energy calculations using a plane-wave basis set. *Phys. Rev. B* **1996**, *54*, 11169-11186.
- (3) Blöchl, P. E. Projector augmented-wave method. *Phys. Rev. B* **1994**, *50*, 17953-17979.
- (4) Kresse, G.; Hafner, J. *Ab initio* molecular-dynamics simulation of the liquid-metal-amorphous-semiconductor transition in germanium. *Phys. Rev. B* **1994**, *49*, 14251-14269.
- (5) Perdew, J. P.; Burke, K.; Ernzerhof, M. Generalized gradient approximation made simple. *Phys. Rev. Lett.* **1996**, *77*, 3865-3868.

- (6) Grimme, S.; Antony, J.; Ehrlich, S.; Krieg, H. A consistent and accurate *ab initio* parametrization of density functional dispersion correction (DFT-D) for the 94 elements H-Pu. *J. Chem. Phys.* **2010**, *132*, 154104.
- (7) Henkelman, G.; Uberuaga, B. P.; Jónsson, H. A climbing image nudged elastic band method for finding saddle points and minimum energy paths. *J. Chem. Phys.* **2000**, *113*, 9901-9904.
- (8) Mills, G.; Jónsson, H.; Schenter, G.K. Reversible work transition state theory: application to dissociative adsorption of hydrogen. *Surf. Sci.* **1995**, *324*, 305-337.

**Supplementary Figures and Table: Figure S1-Figure S14 and Table 1-Table 2**

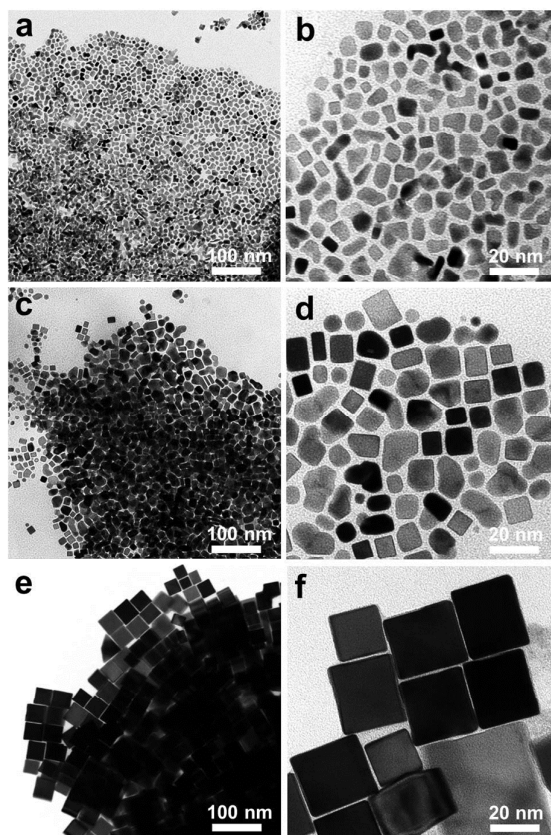

**Figure S1.** TEM images of the products obtained by using the same reaction conditions as those of Pd<sub>3</sub>Pb NCs except for the use of (a, b) 0 mg DTAC, (c, d) 3.3 mg DTAC and (e, f) 26.4 mg DTAC.

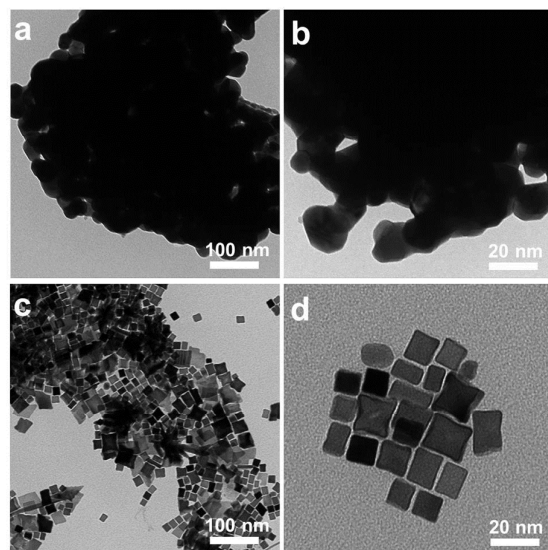

**Figure S2.** TEM images of the products obtained by using the same reaction conditions as those of Pd<sub>3</sub>Pb SCNCs except for the use of (a, b) 20 mg benzoic acid and (c, d) 80 mg benzoic acid.

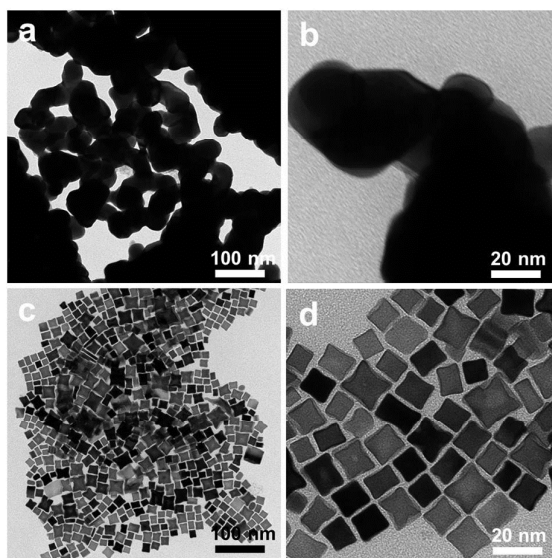

**Figure S3.** TEM images of the products obtained by using the same reaction conditions as those of Pd<sub>3</sub>Pb CNCs except for the use of (a, b) 0.05 mL benzaldehyde and (c, d) 0.2 mL benzaldehyde.

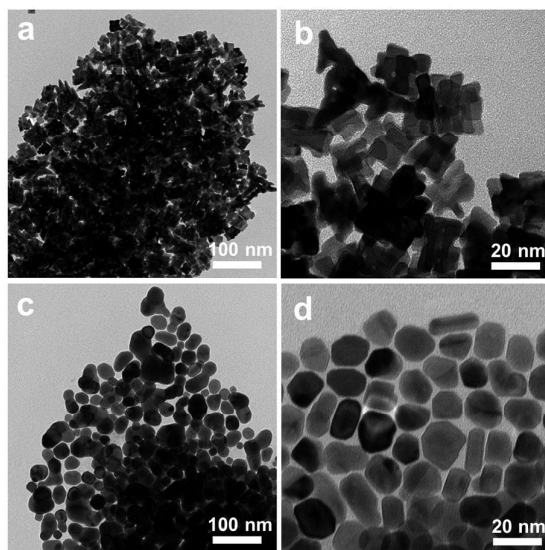

**Figure S4.** TEM images of the products obtained by using the same reaction conditions as those of  $\text{Pd}_3\text{Pb}$  CNCs but changing 0.1 mL benzaldehyde to (a, b) 0.1 mL benzyl alcohol and (c, d) 0.1 mL aniline.

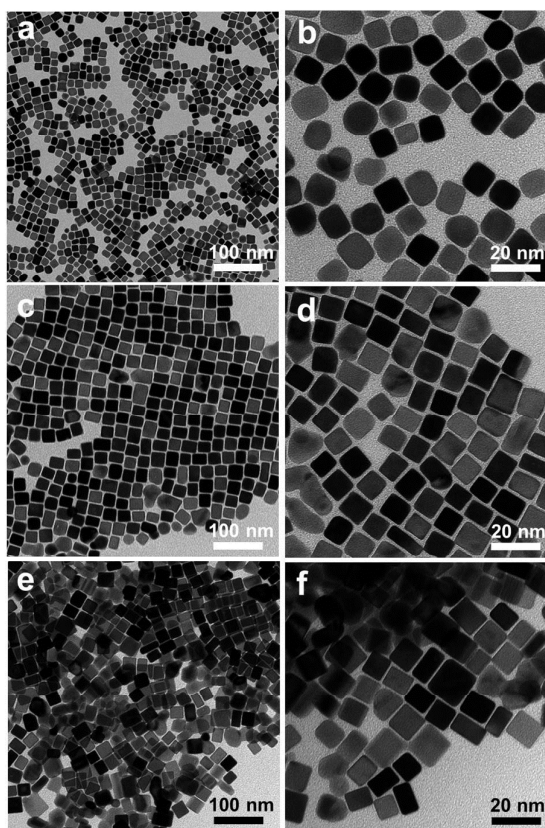

**Figure S5.** TEM images of the products obtained by using the same reaction conditions as those of  $\text{Pd}_3\text{Pb}$  NCs but changing 3.2 mg  $\text{Pb}(\text{Ac})_2 \cdot 3\text{H}_2\text{O}$  to (a, b) 2.3 mg  $\text{PbCl}_2$ , (c, d) 3.8 mg  $\text{Pb}(\text{acac})_2$  and 2.7 mg  $\text{Pb}(\text{HCOO})_2$ , respectively.



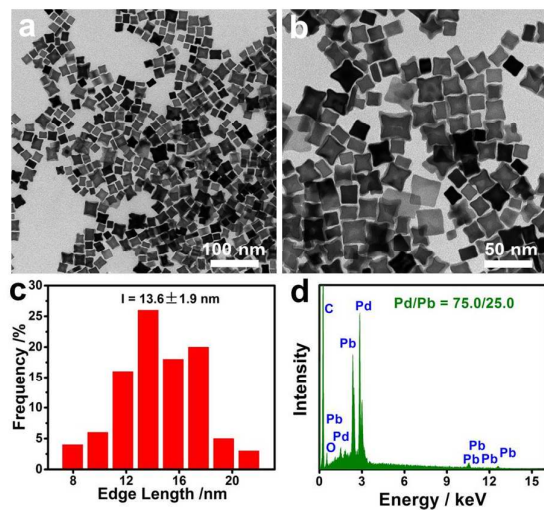

**Figure S6.** (a, b) TEM images, (c) edge length distribution and (d) SEM-EDX of the Pd<sub>3</sub>Pb CNCs.

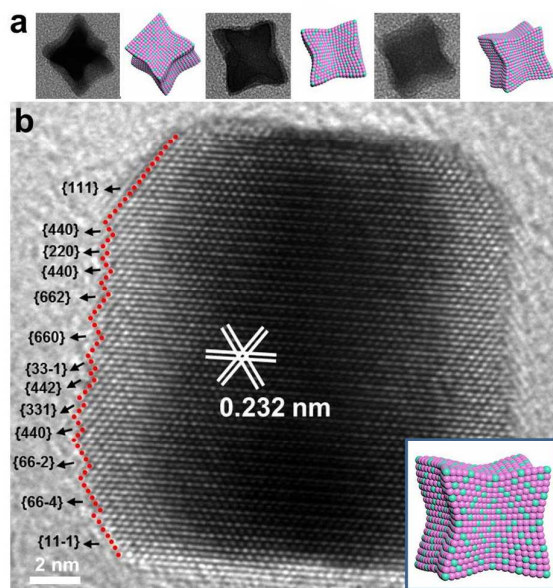

**Figure S7.** (a) TEM images and the projection models with different angles and (b) HRTEM image of Pd<sub>3</sub>Pb CNCs. The inset in (b) is the 3D structure model of Pd<sub>3</sub>Pb CNC.

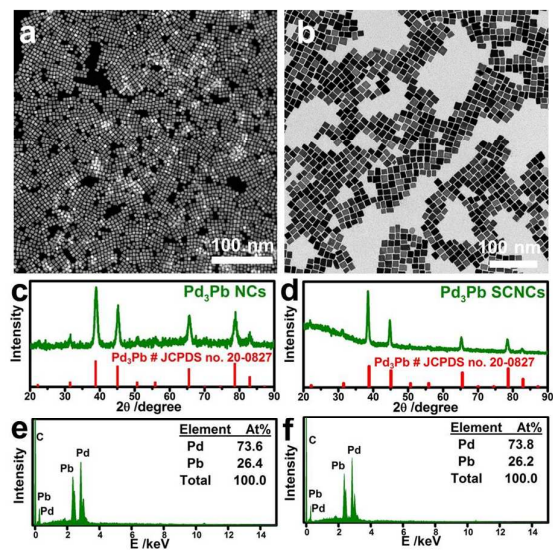

**Figure S8.** (a) STEM image, (c) PXRD pattern and (e) TEM-EDX of Pd<sub>3</sub>Pb NCs. (b) TEM image, (d) PXRD pattern and (f) TEM-EDX of Pd<sub>3</sub>Pb SCNCs.

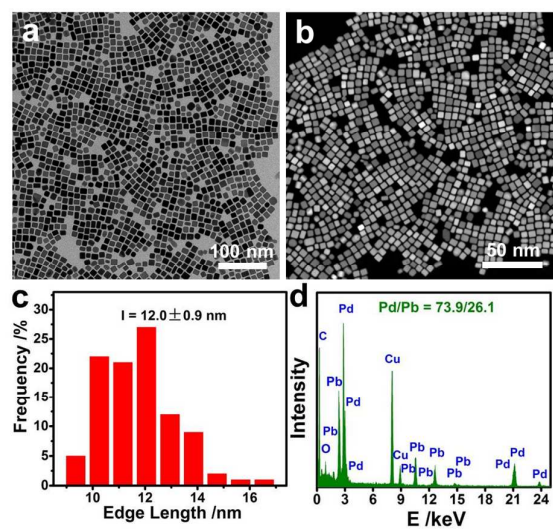

**Figure S9.** (a) TEM image, (b) STEM image, (c) edge length distribution and (d) SEM-EDX of Pd<sub>3</sub>Pb NCs.

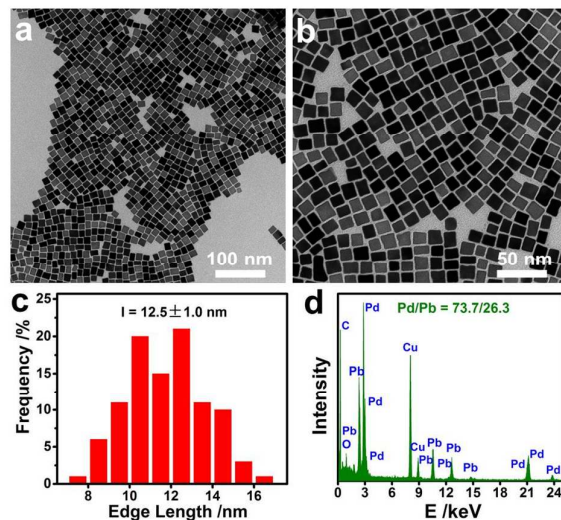

**Figure S10.** (a, b) TEM images, (c) edge length distribution and (d) SEM-EDX of Pd<sub>3</sub>Pb SCNCs.

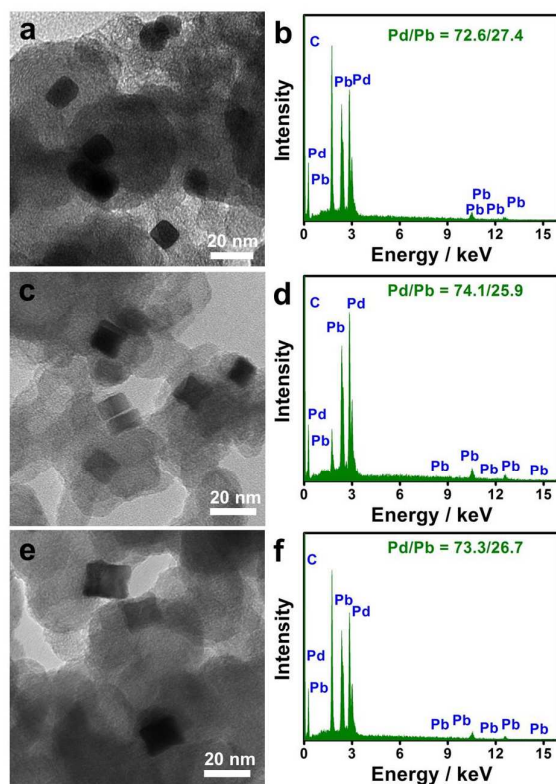

**Figure S11.** (a) TEM image and (b) SEM-EDX spectrum of Pd<sub>3</sub>Pb NCs/C. (c) TEM image and (d) SEM-EDX spectrum of Pd<sub>3</sub>Pb SCNCs/C. (e) TEM image and (f) SEM-EDX spectrum of Pd<sub>3</sub>Pb CNCs/C.

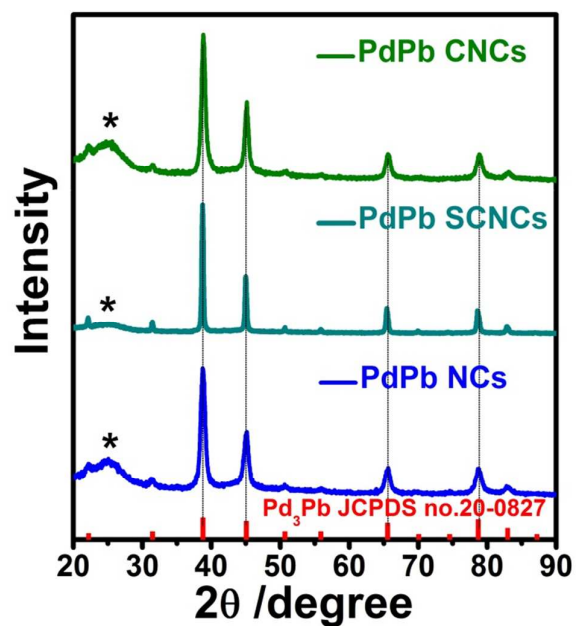

**Figure S12.** XRD patterns of 3 wt% Pd<sub>3</sub>Pb NCs/C, 3 wt% Pd<sub>3</sub>Pb SCNCs/C and 3 wt% Pd<sub>3</sub>Pb CNCs/C after calcining treatment. “\*” notes the diffraction peak of C.

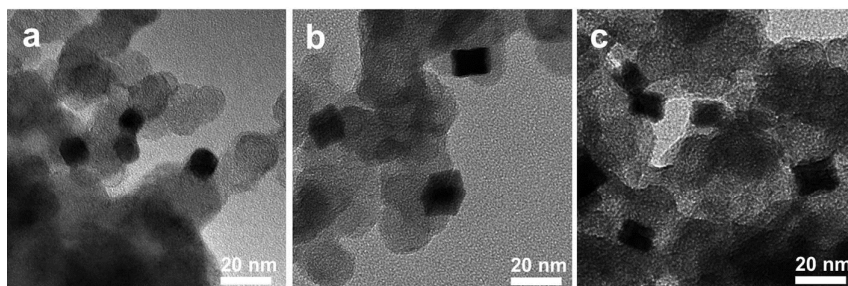

**Figure S13.** (a) TEM image of Pd<sub>3</sub>Pb NCs/C, (b) TEM image of Pd<sub>3</sub>Pb SCNCs/C and (c) TEM image of Pd<sub>3</sub>Pb CNCs/C after calcining treatment.

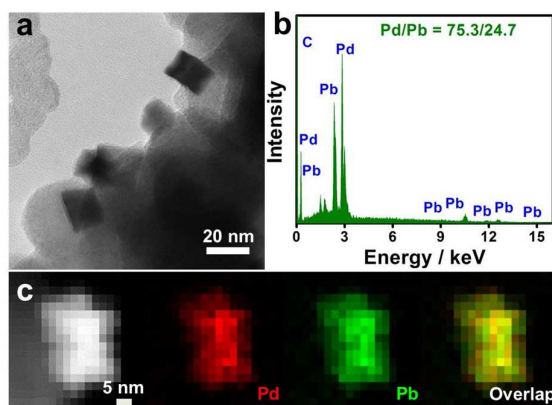

**Figure S14.** (a) TEM image, (b) SEM-EDX spectrum, and (c) HAADF-STEM image and elemental mappings of the Pd<sub>3</sub>Pb CNCs/C after stability tests.

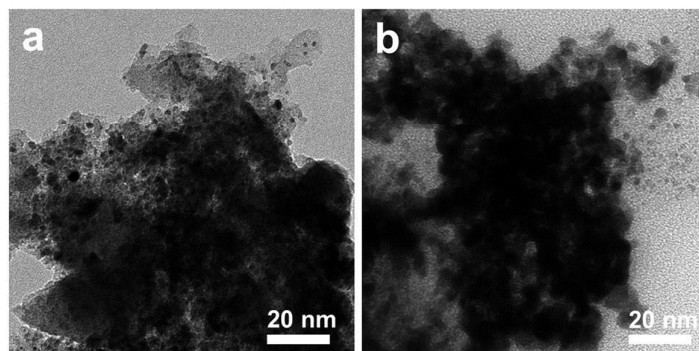

**Figure S15.** TEM images of 10% Pd/C (a) before and (b) after catalytic reaction.

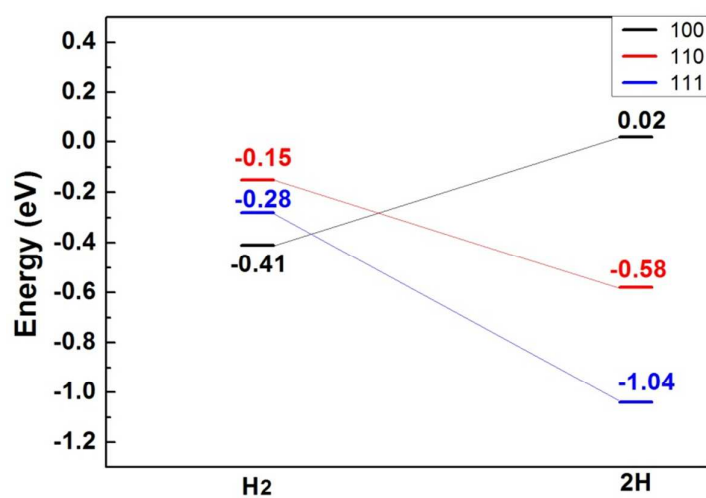

**Figure S16.** The energy of H<sub>2</sub> dissociation on (100) (110) and (111) surfaces of Pd<sub>3</sub>Pb.



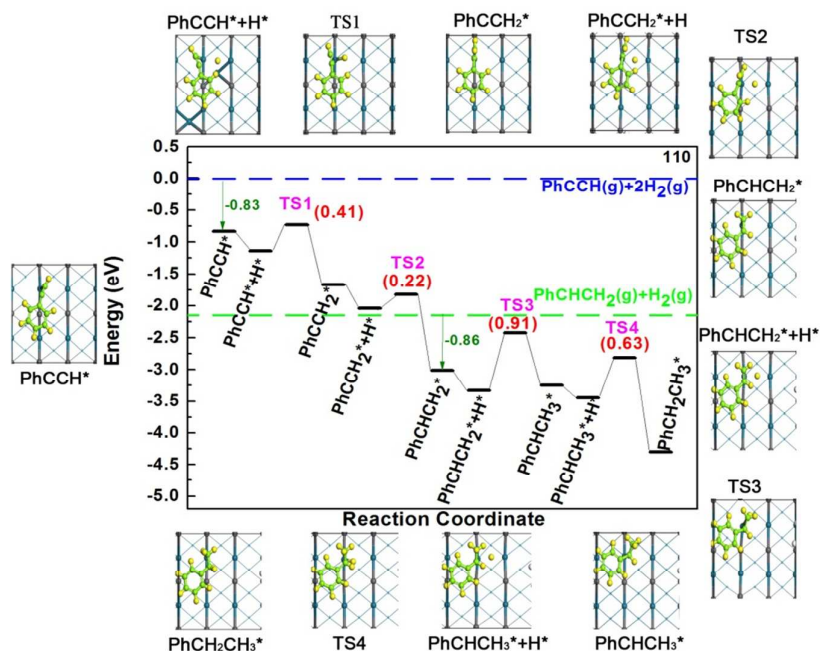

**Figure S17.** Step-by-step hydrogenation mechanism of phenylacetylene to phenylethane on the  $\text{Pd}_3\text{Pb}$  (110) surface. Numbers in the parentheses indicate the barriers of elementary steps; Pb, grey; Pd, blue; C, green; H, yellow.

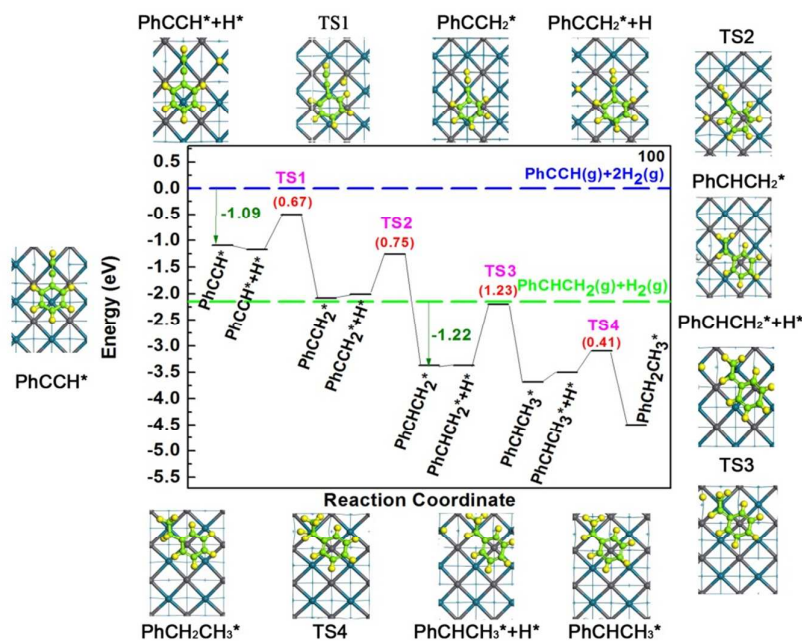

**Figure S18.** Step-by-step hydrogenation mechanism of phenylacetylene to phenylethane on the  $\text{Pd}_3\text{Pb}$  (100) surface. Numbers in the parentheses indicate the barriers of elementary steps; Pb, grey; Pd, blue; C, green; H, yellow.

yellow.

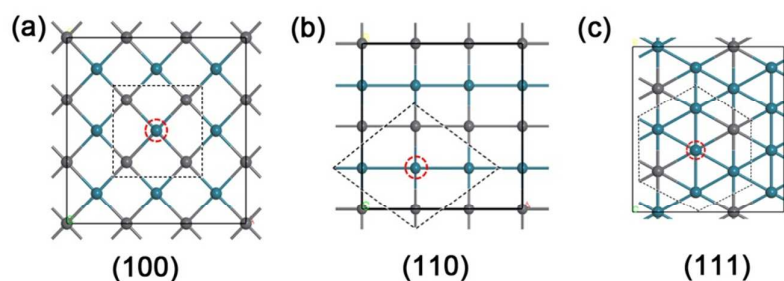

**Figure S19.** The atomic distribution of (100) (110) (111) surface of Pd<sub>3</sub>Pb. The black dashed line includes the surrounding atoms with the central Pd atom in red dashed line.

**Table S1.** The concentration of Pd and Pb for 3 wt% Pd<sub>3</sub>Pb NCs, 3 wt% Pd<sub>3</sub>Pb SCNCs and 3 wt% Pd<sub>3</sub>Pb CNCs.

|                                | Pd wt% | Pb wt% |
|--------------------------------|--------|--------|
| 3 wt% Pd <sub>3</sub> Pb NCs   | 3.07   | 1.01   |
| 3 wt% Pd <sub>3</sub> Pb SCNCs | 2.98   | 0.98   |
| 3 wt% Pd <sub>3</sub> Pb CNCs  | 3.04   | 1.02   |

**Table S2.** XPS derived molar ratios (at%) and chemical states of 3.07 wt% Pd<sub>3</sub>Pb NCs/C, 2.98 wt% Pd<sub>3</sub>Pb SCNCs and 3.04 wt% Pd<sub>3</sub>Pb CNCs/C.

| Entry | Catalyst                            | Pd<br>(at%) | Pb<br>(at%) | Pd(3d <sub>5/2</sub> ) |               | Pb(4f <sub>7/2</sub> ) |               | Pb/Pd<br>ratio |
|-------|-------------------------------------|-------------|-------------|------------------------|---------------|------------------------|---------------|----------------|
|       |                                     |             |             | Binging Energy/eV      |               | Binging Energy/eV      |               |                |
|       |                                     |             |             | Pd(0)                  | Pd(II)        | Pb(0)                  | Pb(II)        |                |
| 1     | 3.07 wt% Pd <sub>3</sub> Pb NCs/C   | 73.3        | 26.7        | 336.0 (78.3%)          | 337.2 (21.7%) | 137.4 (69.0%)          | 139.0 (31.0%) | 0.364          |
| 2     | 2.98 wt% Pd <sub>3</sub> Pb SCNCs/C | 76.9        | 23.6        | 336.0 (77.5%)          | 337.5 (22.5%) | 137.4 (77.5%)          | 139.1 (22.5%) | 0.307          |
| 3     | 3.04 wt% Pd <sub>3</sub> Pb CNCs/C  | 75.5        | 24.5        | 336.0 (88.5%)          | 337.3 (11.5%) | 137.4 (65.4%)          | 138.9 (34.6%) | 0.325          |

**Table S3.** Adsorption energies in eV determined by DFT for H<sub>2</sub> and H atom.

|     | E <sub>ads</sub> (H <sub>2</sub> ) | E(H)  |
|-----|------------------------------------|-------|
| 100 | -0.41                              | 0.01  |
| 110 | -0.15                              | -0.29 |
| 111 | -0.28                              | -0.52 |
